1 **Use of therapeutic play in nursing care for school-age children: a scoping review**

2

3 Luanna Gomes da Silva. Programa de Pós-Graduação em Enfermagem, Universidade Regional do  
4 Cariri, Crato, Ceará, Brazil. E-mail: [luanna.silva@urca.br](mailto:luanna.silva@urca.br)

5 Célida Juliana de Oliveira. Programa de Pós-Graduação em Enfermagem, Departamento de  
6 Enfermagem, Universidade Regional do Cariri, Crato, Ceará, Brazil. E-mail:  
7 [celida.oliveira@urca.br](mailto:celida.oliveira@urca.br)

8 Joseph Dimas de Oliveira. Departamento de Enfermagem, Universidade Regional do Cariri, Crato,  
9 Ceará, Brazil. E-mail: [joseph.oliveria@urca.br](mailto:joseph.oliveria@urca.br)

10 Paulo Felipe Ribeiro Bandeira\*. Universidade Regional do Cariri, Crato, Ceará, Brazil:  
11 Universidade Federal do Vale do São Francisco - UNIVASF E-mail: [paulo.bandeira@urca.br](mailto:paulo.bandeira@urca.br)

12 José Hiago Feitosa de Matos. Programa de Pós-Graduação em Enfermagem, Departamento de  
13 Enfermagem, Universidade Regional do Cariri, Crato, Ceará, Brazil. E-mail: [hiago.feitosa@urca.br](mailto:hiago.feitosa@urca.br)

14 Emiliana Bezerra Gomes. Programa de Pós-Graduação em Enfermagem, Departamento de  
15 Enfermagem, Universidade Regional do Cariri, Crato, Ceará, Brazil. E-mail:  
16 [emiliana.gomes@urca.br](mailto:emiliana.gomes@urca.br)

17 Izabel Cristina Santiago Lemos de Beltrão. Departamento de Enfermagem, Universidade Regional  
18 do Cariri, Crato, Ceará, Brazil. E-mail: [izabel.lemos@urca.br](mailto:izabel.lemos@urca.br)

19 Álissan Karine Lima Martins. Programa de Pós-Graduação em Enfermagem, Departamento de  
20 Enfermagem, Universidade Regional do Cariri, Crato, Ceará, Brazil. E-mail:  
21 [alissan.martins@urca.br](mailto:alissan.martins@urca.br)

22

23 \*Correspondence author: Paulo Felipe Ribeiro Bandeira. Universidade Regional do Cariri. Rua Cel.  
24 Antônio Luís 1161, Pimenta, 63.100-000, Crato, Ceará, Brazil. E-mail: [paulo.bandeira@urca.br](mailto:paulo.bandeira@urca.br)

25

26

27

28

29

30

31

32

33

34

35

36 **Abstract**

37 *Background:* Therapeutic play is an important strategy in nursing care to relieve emotional  
38 discomfort of school-age children. The aim of this scoping review was to map the use of therapeutic  
39 play in nursing care for school-age children.

40 *Methods:* Searches in the databases: MEDLINE, CINAHL, Scopus, BDNF, LILACS and CAPES  
41 theses and dissertations portal. A total of 1,486 records were identified and 32 included in the  
42 review. Eligibility criteria: The literature on children aged 6 to 12 participating in therapeutic play  
43 sessions in nursing care in any place, in the form of original articles, theses and dissertations, in  
44 English, Spanish or Portuguese. There was no time limit.

45 *Results:* The focus theme has been described since 1987 in the national and international scientific  
46 literature. There is consensus on the benefits of therapeutic play in nursing care for school-age  
47 children in various situations, especially in the hospital context, with proven efficacy in research  
48 that encourages the application of this strategy in nursing practice, but there are barriers for its  
49 implementation.

50 *Conclusion:* The review identified the settings, situations, benefits, barriers and gaps regarding the  
51 use of therapeutic play in nursing care for school-age children.

52 *Implications:* The positive results reported in the studies can be used to enrich discussions about the  
53 use of therapeutic play in nursing practice for school-age children and encourage awareness of the  
54 importance of this strategy. The gaps identified contribute to future research.

55 **Keywords:** Child, Play and Playthings, Pediatric Nursing.

56

57

58 **Introduction**

59 Nursing's role in child health care allows the integration of specific knowledge to ensure the  
60 quality of care and skills that provide good conditions of interaction with the child (Brondani &  
61 Pedro, 2019). One of the resources that favors this interaction is play, an essential activity for the  
62 development and well-being of the child that does not cease when falls ill. When the opportunity to  
63 play is not offered, it may present behavioral changes, such as irritable mood, aggressive attitudes,  
64 difficulty in social interaction and developmental delay (Oliveira et al., 2015).

65 One aspect of the modalities of play is therapeutic play (TP), a care strategy commonly used  
66 to relieve children's anxiety and promote psychosocial well-being (Burns-Nader & Hernandez-Reif,  
67 2014; R. D.M. Silva et al., 2017). Among the modalities of TP was included the instructional (ITP),  
68 which prepares for health procedures to which the child will be submitted; the dramatic (DTP),  
69 which allows the emotional discharge of the child including the manifestation of feelings, desires

70 and experiences; and the enabler (ETP) of physiological functions, potentiating the rehabilitation of  
71 physiological functions in cases where the child shows regressive behavior for the age (Lemos et  
72 al., 2016a; Pennafort et al., 2018).

73 The TP is a structured toy, applied by a professional trained in the technique and with toys  
74 recommended in the literature, including cloth or plastic dolls, puppets, animals, carts, graphic  
75 material, real or symbolic materials representing the hospital and domestic settings (Maia et al,  
76 2020).

77 The practice of TP has been described in the literature as an important strategy in nursing  
78 care for children in different health settings because it is a resource that favors the provision of  
79 holistic and humanized care due to its numerous benefits (Costa et al., 2016; Gesteira et al., 2011;  
80 Santos et al., 2017). For the nursing team, it serves as a strategy to establish communication with  
81 the child, prepare them for procedures, know their feelings and concerns. For the child, it helps to  
82 express their perceptions and needs, alleviate fears, tension and anxiety generated by experiences  
83 that seem threatening, optimizing integral well-being and reducing harm in child development  
84 (Caleffi et al., 2016; Pennafort et al., 2018).

85 Studies indicate that children at school-age are still vulnerable to emotional discomfort  
86 arising from the disease process, which reduce their sense of control and power, favoring the  
87 emotional discomfort caused by the experience of illness, such as fear, anguish and sadness  
88 (Nóbrega et al., 2010; S. G. T. Silva et al., 2017). Therefore, the school-age children need to receive  
89 assistance that allows promoting their emotional well-being. Nursing professionals have a relevant  
90 role to listen to, believe and meet the emotional needs expressed by this child through therapeutic  
91 play, which is a child's right, and should be incorporated into nursing care (Costa et al., 2016;  
92 Nóbrega et al., 2010; World Health Organization Regional Office for Europe, 2017). Thus, it is not  
93 enough to have a defined place for recreational games; it is necessary to use TP aiming to achieve  
94 all the therapeutic benefits it provides (Costa et al., 2016; Costa et al., 2019).

95 The World Health Organization (WHO), with the objective of guaranteeing children  
96 effective health care based on best practices, addresses the need to offer children emotional support,  
97 reiterating the right of children to play therapeutically in health units (World Health Organization,  
98 2018). It is worth mentioning the relevance of recreational activities for children, is assured by the  
99 United Nations Children' Fund (1990).

100 However, studies show that even in view of the importance and recommendation to  
101 incorporate TP in pediatric nursing care, its practice is still modest or not observed in the routine of  
102 the teams, encountering difficulties regarding its use (Costa et al., 2016; Costa et al., 2019;  
103 Francischinelli et al., 2012; Santos et al., 2020). Moreover, there are several studies developed on

104 the effects of TP in all phases throughout childhood, however, a broad survey of studies addressing  
105 the practice of TP in nursing care for school-age children still represents a gap in the literature.

106 In view of these aspects, the need to perform a scoping review is justified to explore the  
107 knowledge available in the literature about the use of TP in nursing care for school-age children  
108 with emphasis on its application in the care process, the benefits for care and the barriers for its  
109 implementation. Thus, the aim of this scoping review was to map the use of therapeutic play in  
110 nursing care for school-age children.

111

## 112 **Methods**

### 113 *Design*

114 This scoping review was undertaken following the JBI methodology (Peters et al., 2020) and  
115 PRISMA Extension for Scope Reviews (PRISMA-ScR): Checklist (Tricco et al., 2018). This type  
116 of review is a form of knowledge synthesis, addresses a broad research issue and allows to provide  
117 an overview of a topic, in addition to mapping the evidence, clarifying research areas and  
118 identifying gaps for future research (Peters et al., 2020).

119 The strategy guided by the mnemonic Population, Concept and Context (PCC) based on the  
120 construction of the research question: "What is the state of the art on the use of therapeutic play in  
121 nursing care for school-age children?", the following elements being: P- school-age children; C-  
122 therapeutic play; C- nursing care.

123

### 124 *Eligibility criteria*

125 The inclusion criteria were formulated to allow obtaining the largest number of publications  
126 available. In relation to the population, studies were included in which children aged 6 to 12  
127 participated in TP sessions, according to school-age defined by reference literature in pediatric  
128 nursing (Hockenberry & Wilson, 2011). In the concept, studies were included with TP applied as a  
129 structured toy, including cloth or plastic dolls, puppets, animals, carts, graphic material, real or  
130 symbolic materials representing the hospital and domestic settings (Maia et al., 2020). Regarding  
131 the context, studies were included with TP applied by nursing in any nursing care area.

132 This review included empirical studies, theses and dissertations, published in English,  
133 Spanish or Portuguese. There was no time limit. This review excluded duplicate studies, with full  
134 text unavailable in open access and for not meeting the objective of this study.

135

### 136 *Information sources*

137 The search strategy for scientific production was carried out between June and July 2020, in  
 138 three stages, by two independent reviewers. In the first, a broad search was conducted, with the  
 139 descriptors child [MeSH] and nursing [MeSH] and therapeutic play [keyword] limited to the  
 140 CINAHL (Ebsco) and MEDLINE (PubMed) databases, with the purpose of analyzing the title  
 141 words, abstract and descriptors of the studies, and the keywords and descriptors that aligned with  
 142 the objective of this study were removed to assemble the search keys of the next step.

143 In the second stage, using the search keys elaborated, new searches were performed in the  
 144 databases: MEDLINE, CINAHL, Scopus, LILACS and BDEF. It is notable that the search keys  
 145 were composed of descriptors MeSH and DeCS (LILACS and BDEF) and keywords,  
 146 interconnected by boolean “AND” or “OR” operators.

147 In the third stage, all the articles included in the review, after reading in full, had their list of  
 148 references explored in search of additional studies that had not been mapped in the previous stages.

149 As for the grey literature (Peters et al., 2020), it was researched in May 2021 in the database  
 150 of theses and dissertations of CAPES (Coordination for the Improvement of Higher Education  
 151 Personnel), using “child” and “therapeutic play” and “nursing”.

152 Table 1 describes the search strategy adopted in each database and the identified studies.

153

154 **Table 1**

155 Databases, search strategies and identified studies.

| Databases            | Search strategies                                                          | Identified studies |
|----------------------|----------------------------------------------------------------------------|--------------------|
| MEDLINE<br>(PubMed)  | <i>child AND nursing AND therapeutic play</i>                              | 127                |
|                      | <i>child AND pediatric nursing AND play therapy</i>                        | 23                 |
|                      | <i>child AND nursing AND play therapy</i>                                  | 115                |
| CINAHL<br>(EBSCO)    | <i>child AND nursing AND therapeutic play OR therapeutic toy</i>           | 293                |
|                      | <i>child AND nursing AND therapeutic play</i>                              | 30                 |
|                      | <i>child AND pediatric nursing AND play therapy</i>                        | 28                 |
|                      | <i>child AND nursing AND play therapy</i>                                  | 40                 |
| Scopus<br>(Elsevier) | <i>child AND nursing AND therapeutic play OR therapeutic toy</i>           | 41                 |
|                      | <i>“child” AND “nursing” AND “therapeutic play”</i>                        | 68                 |
|                      | <i>“child” AND “pediatric nursing” AND “play therapy”</i>                  | 42                 |
| LILACS               | <i>“child” AND “nursing” AND “play therapy”</i>                            | 140                |
|                      | <i>“child” AND “nursing” AND “therapeutic play” OR “therapeutic toy”</i>   | 76                 |
|                      | <i>criança AND enfermagem AND brinquedo terapêutico</i>                    | 0                  |
|                      | <i>criança AND enfermagem pediátrica AND brinquedo terapêutico</i>         | 0                  |
| BDEF                 | <i>enfermagem AND brinquedo AND terapêutico</i>                            | 64                 |
|                      | <i>criança AND enfermagem AND jogos e brinquedos</i>                       | 95                 |
|                      | <i>criança AND enfermagem AND brinquedo AND terapêutico</i>                | 49                 |
|                      | <i>criança AND enfermagem AND pediátrica AND brinquedo AND terapêutico</i> | 41                 |
| CAPES<br>database    | <i>enfermagem AND brinquedo AND terapêutico</i>                            | 53                 |
|                      | <i>criança AND enfermagem AND jogos AND brinquedos</i>                     | 112                |
|                      | <i>criança AND brinquedo terapêutico AND enfermagem</i>                    | 45                 |
| TOTAL                |                                                                            | 1482               |

156

157 *Selection sources of evidence*

158 Two reviewers participated in the selection of studies, based on the pre-specified inclusion  
159 criteria. The divergence regarding the inclusion of some study was treated with a third reviewer.

160

161 *Data extraction and analysis*

162 The data extraction of the studies used the standardized JBI data extraction tool (Peters et  
163 al., 2020), which made it possible to organize the data based on the characterization of the studies,  
164 details about the population, concept and context, and main findings related to the questions of the  
165 review, and descriptive analysis was performed.

166

167 **Results**

168 From the 1,482 studies, duplicates (n=823) were excluded, which did not meet the inclusion  
169 criteria by reading the title (n=431) and abstract (n=99). Subsequently, 133 studies were read in full,  
170 being excluded because they did not meet the objective of the review (n=88) and full text  
171 unavailable in free access (n=13), and 28 studies were selected that, after analyzing their references,  
172 allowed the identification of four more studies. The final sample consisted of 32 studies (Fig.1).

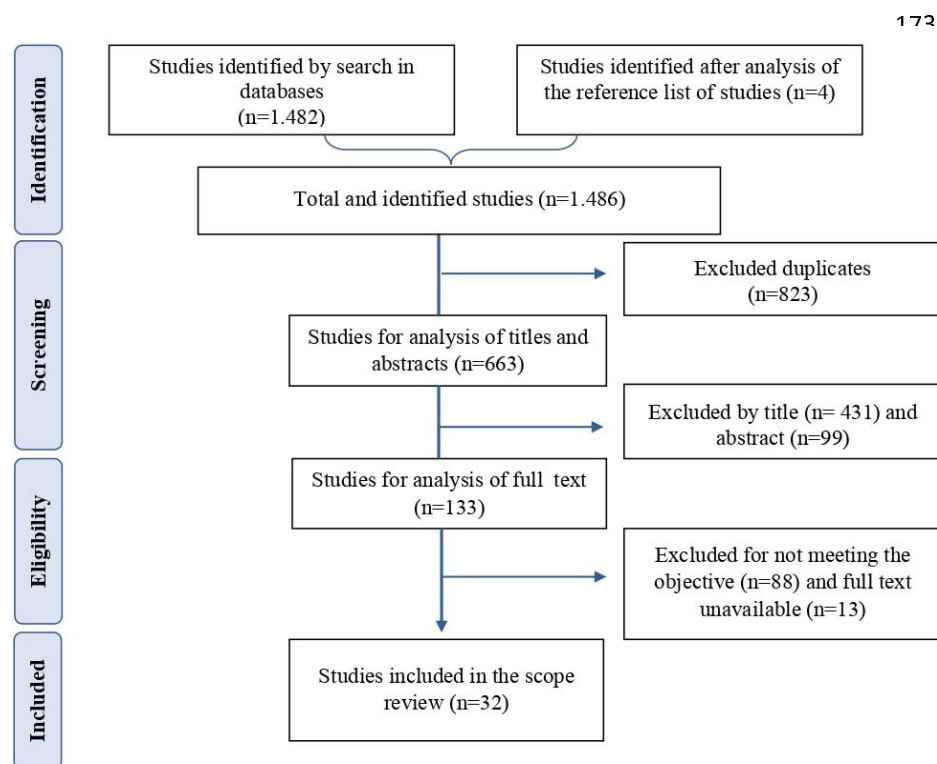

189

190

**Fig. 1.** Flowchart of the study selection process according to PRISMA-ScR and JBI recommendations. Source: adapted from Moher et al. (2009).

191

192 Table 2 presents the information that characterizes the 32 studies included in the sample  
 193 analyzed in this scoping review.

194

195 **Table 2**

196 Selected studies in the scoping review on the use of therapeutic play in nursing care for school-age  
 197 children.

| Code | Author, year, country          | Study design                          | Interventions                                                        | Participants               | Results                                                                                                                                                                |
|------|--------------------------------|---------------------------------------|----------------------------------------------------------------------|----------------------------|------------------------------------------------------------------------------------------------------------------------------------------------------------------------|
| 1    | Duarte et al., (1987), Brazil  | Quantitative, experimental            | TP in the process of recovery of children in the post-surgical       | Pre-pupil and pupil (N=34) | More positive behavior in relation to orientation, tranquility, confidence, joy, attention and attention; reduction of permanence in the Post-Anesthetic Recovery Room |
| 2    | Rocha &Prado (2006), Brazil    | Qualitative, convergent research care | Use of TP with children victims of violence                          | Pupil (N=3)                | Children were able to express their fears, anxieties, their imaginative and real worlds; Better interaction between child, nurse and environment.                      |
| 3    | Rocha et al., (2008), Brazil   | Qualitative, convergent research care | Use of TP with children victims of violence                          | Pupil (N=4)                | Construction of a nursing care model with TP application; TP facilitated the care process and made it possible to know the care needs of children victims of violence. |
| 4    | Li & Lopez (2008), China       | Quantitative Experimental             | TP in preparing children for surgery                                 | Pupil (N=203)              | Efficacy in minimizing pre- and postoperative anxiety levels of children and their parents; parents with a higher degree of satisfaction.                              |
| 5    | Kiche & Almeida (2009), Brazil | Quantitative exploratory descriptive  | TP in the emotional preparation of children during surgical dressing | Pre-pupil and pupil (N=34) | Reduction of pain, fear and tension during dressing; Greater adaptation and acceptance to the procedure; family satisfied with the behavior of the child.              |
| 6    | Ribeiro et al., (2009), Brazil | Qualitative Descriptive               | DTP session with Port-a-Cath child carrier                           | Pupil and teenager (N=7)   | Children felt happy, comforted and strengthened by playing, expressed their concerns and took control of the situation.                                                |
| 7    | Fontes et al., (2010), Brazil  | Quantitative exploratory descriptive  | TP in the preparation of the child submitted to elective surgery     | Pre-pupil and pupil (N=44) | Better adaptation of the child and opportune externalizing emotions and conflicts about the reality experienced.                                                       |
| 8    | Jansen et al., (2010), Brazil  | Qualitative exploratory               | TP during nursing care                                               | Pupils and mothers of      | Excellent strategy for nursing care to children, as it facilitates                                                                                                     |



|    |                                       | descriptive                                               | for hospitalized children                                                 | pre-pupils(N=10)                                                       | communication, participation and acceptance of procedures; Minimizes the tensions generated by hospitalization; Transmits safety and comfort to the child.                                                                                         |
|----|---------------------------------------|-----------------------------------------------------------|---------------------------------------------------------------------------|------------------------------------------------------------------------|----------------------------------------------------------------------------------------------------------------------------------------------------------------------------------------------------------------------------------------------------|
| 9  | A. A. M. Souza (2011), Brazil         | Qualitative                                               | TP with child with sickle cell anemia                                     | Pre-pupils and pupils, parents (N=14)                                  | It allowed expression of feelings, greater sense of control, active role in pain management, resignifies experiences and seeks to overcome the suffering imposed by the disease.                                                                   |
| 10 | Conceição et al., (2011), Brazil      | Qualitative Descriptive                                   | TP in preparation for outpatient venous puncture                          | Mothers, father, grandmother, caregiver of pre-pupils and pupils (N=8) | Parents approve the preparation of children with TP and recognize that it favors knowledge about the procedure, decreases fear, calms and promotes the safety of them and the child; Quality and humanized nursing care for children and families. |
| 11 | Vaezzadeh et al., (2011), Iran        | Quantitative, experimental                                | TP in preoperative preparation of children                                | Pupil (N=122)                                                          | It has been shown to prepare children before surgery and effective to minimize their level of anxiety.                                                                                                                                             |
| 12 | Cruz et al., (2012), Brazil           | Qualitative Descriptive                                   | TP in the nursing consultation for children with type 1 diabetes mellitus | Pupil (N=3)                                                            | Improved the interaction of the nurse-child-family, helping the child to accept the treatment and assimilate the situation experienced; guidance from parents on therapy.                                                                          |
| 13 | L. P. S. Souza et al., (2012), Brazil | Qualitative Descriptive                                   | TP with child with cancer in chemotherapy                                 | Pre-pupil and pupil (N=5)                                              | Contributed to the expression of feelings and concerns.                                                                                                                                                                                            |
| 14 | Fontes et al., (2013), Brazil         | Qualiquantitativo exploratory, descriptive, observational | TP in the preparation of children undergoing surgery                      | Pupil (N=40)                                                           | It favored the relief of tensions, acceptance of care and expression of feelings; Parents noticed improvement in the child's behavior; facilitates nursing care.                                                                                   |
| 15 | Li et al., (2014), China              | Quantitative Experimental                                 | TP in the preparation of children undergoing elective surgery             | Pupil (N=108)                                                          | Reduction of anxiety scores and increased sense of control; Acceptable intervention by children, parents and health professionals.                                                                                                                 |
| 16 | La Bancaet al., (2015), Brazil        | Qualitative Descriptive                                   | TP with children with type 1 diabetes mellitus                            | Pupil (N=8)                                                            | It favored the revelation of fears, desires, stress relief and the mastery of the situation, besides showing an important intervention for nursing.                                                                                                |
| 17 | Pereira et al., (2015), Brazil        | Qualitative Descriptive                                   | TP and children with                                                      | Pupil (N=6)                                                            | It was decisive to give voice to the child, favoring the                                                                                                                                                                                           |



|    |                                         |                                                                  |                                                                     |                                                          |                                                                                                                                                          |
|----|-----------------------------------------|------------------------------------------------------------------|---------------------------------------------------------------------|----------------------------------------------------------|----------------------------------------------------------------------------------------------------------------------------------------------------------|
|    |                                         |                                                                  | attention deficit hyperactivity disorder                            |                                                          | expression of feelings, elaborate lived experiences, face them and overcome them.                                                                        |
| 18 | Pontes et al., (2015), Brazil           | Quantitative Almost-experimental                                 | TP in the preparation of children for vaccination                   | Pre-pupil and pupil (N=60)                               | It proved to be an important instrument in the preparation of the child for the vaccine.                                                                 |
| 19 | Caleffi et al., (2016), Brazil          | Qualitative, convergent research care                            | TP in a Nursing Care Model in the care of hospitalized children     | Pre-pupil and pupil (N=7)                                | The children had the opportunity to clarify doubts, decreased their fears, understood the need for procedures and experienced a quieter hospitalization. |
| 20 | Dantas et al., (2016), Brazil           | Qualitative Exploratory                                          | TP in preparation for intravenous medication administration         | Pre-pupils and pupils , mothers and aunt (N=18)          | Children expressed their feelings and accepted the procedure better; Companions recommend TP for improved care.                                          |
| 21 | Lemos, Silva, et al., (2016), Brazil    | Quantitative exploratory, analytical                             | TP during peripheral venous puncture                                | Pre-pupil and pupil (N=21)                               | Reduction of pain score in 61.70% of the children participating in the study, 61.5% of schoolchildren.                                                   |
| 22 | Lemos, Oliveira, et al., (2016), Brazil | Quantitative exploratory, analytical                             | TP in venous puncture procedure                                     | Pre-pupil and pupil (N=21)                               | Increased acceptance and adaptation to peripheral venous puncture procedure.                                                                             |
| 23 | Quintans (2016), Brazil                 | Qualitative, descriptive, exploratory, cross-sectional and field | TP with hospitalized child                                          | Pre-pupil and pupil (N=34)                               | It made it possible to deal with the reality of the disease and hospitalization and the understanding of stressful hospital situations.                  |
| 24 | Berté et al., (2017), Brazil            | Qualitative exploratory descriptive                              | TP with children submitted to venous puncture in hospital emergency | Nursing team and mothers of pre-pupils and pupils (N=19) | Mothers recognize TP as a facilitator of childcare; Most professionals are unaware of the concept/applicability of TP.                                   |
| 25 | Campos (2017), Brazil                   | Qualitative, descriptive, exploratory, multiple case studies     | TP with children on chemotherapy                                    | Pre-pupil and pupil (N=5)                                | It favored adequate communication with the children and proved effective for the child to verbalize and express the aspects of illness.                  |
| 26 | Fontes et al., (2017), Brazil           | Quantitative exploratory, descriptive                            | TP in Intensive Care Unit                                           | Pre-pupil and pupil (N=11)                               | Better acceptance of care; promoted the team-patient bond, humanized care and interpersonal relationships.                                               |
| 27 | S. G. T. Silva et al., (2017), Brazil   | Quantitative Clinical essay                                      | DTP with hospitalized children                                      | Pupil (N=28)                                             | The children submitted to DTP presented the same degree of anxiety as those of the control group. But the authors reinforce the importance of TP.        |
| 28 | Pennaftort et al.,                      | Qualitative with                                                 | TP with                                                             | Pupil                                                    | It favored the expression of                                                                                                                             |

|    |                                        |                                  |                                          |                                              |                                                                                                                                                                       |
|----|----------------------------------------|----------------------------------|------------------------------------------|----------------------------------------------|-----------------------------------------------------------------------------------------------------------------------------------------------------------------------|
|    | (2018), Brazil                         | ethnonursing assumptions         | children with type 1 diabetes            | (N=26)                                       | doubts, active participation, learning in relation to treatment and expanded skills in self-care.                                                                     |
| 29 | La Banca et al., (2019), Brazil        | Qualitative case study           | TP with children with type 1 diabetes    | Pupil (N=2)                                  | Evidenced the potential of ITP for teaching insulin therapy, identifying children's educational needs and promoting self-care.                                        |
| 30 | Aranha et al., (2020), Brazil          | Qualitative Phenomenologica<br>I | ITP on the child's hospital admission    | The families of pre-pupils and pupils (N=12) | Collaborated in the understanding of therapeutic procedures and families recommend TP as routine nursing care.                                                        |
| 31 | Barroso et al., (2020), Brazil         | Qualitative                      | TP in preparation for venous puncture    | Pre-pupil and pupil (N=7)                    | Participation of the child in care, minimized negative feelings and improved the interaction between child and nurse.                                                 |
| 32 | V. L. A. Santos et al., (2020), Brazil | Qualitative multiple case study  | DTP in the care of hospitalized children | Pre-pupil and pupil (N=6)                    | The results contribute to the understanding of the conduction and analysis of the DTP session, reinforcing the importance of this resource in pediatric nursing care. |

198 TP= therapeutic paly; DTP= dramatic therapeutic play; ITP= instructional therapeutic play

199

200 Included studies were published from 1987-2020, with the majority of studies published in  
201 2016 ( $n=5$ ). Among the studies, 29 were original articles, two dissertations and a thesis, available in  
202 Portuguese ( $n=18$ ) and In English ( $n=14$ ).

203 In the methodological design, the studies had qualitative ( $n=20$ ), quantitative ( $n=11$ ) and  
204 mixed ( $n=1$ ) approaches. As theoretical references, Erikson's Theory of Psychosocial Development  
205 ( $n=2$ ) (Li & Lopez, 2008; Pereira et al., 2015); Lazarus and Folkman's theory of cognitive  
206 assessment, stress, and coping ( $n=1$ ) (Li & Lopez, 2008); Piaget Cognitive Development Theory  
207 ( $n=3$ ) (La Banca et al., 2019; Li & Lopez, 2008; Pereira et al., 2015); Leininger's Cross-Cultural  
208 Theory ( $n=1$ ) (Pennaft et al., 2018); Symbolic Interactionism ( $n=3$ ) (Santos et al., 2020; Souza,  
209 2011; Souza et al., 2012), and Vygotsky's theory of symbolic child play ( $n=2$ )( Pereira et al., 2015;  
210 Santos et al., 2020).

211 In general, the studies conducted interventions with TP in order to compare the behavioral  
212 reactions of the child before and after TP( $n=3$ ) and among children who receive and do not receive  
213 TP( $n=2$ ), examine its efficacy( $n=4$ ), verify its benefits( $n=7$ ), use it as a therapeutic resource ( $n=5$ ),  
214 to understand the experience of the student( $n=9$ ), analyze the perception of family  
215 members/companions and the nursing team about the use of TP ( $n=4$ ) and understand the DTP  
216 session ( $n=1$ ).

217 It is note that 31 studies showed positive outcomes with the use of TP in nursing care for  
 218 school-age children, corresponding to almost 100% of the review sample.

219 Fig. 2 presents a diagram with the main findings on the use of TP in nursing care for school-  
 220 age children.

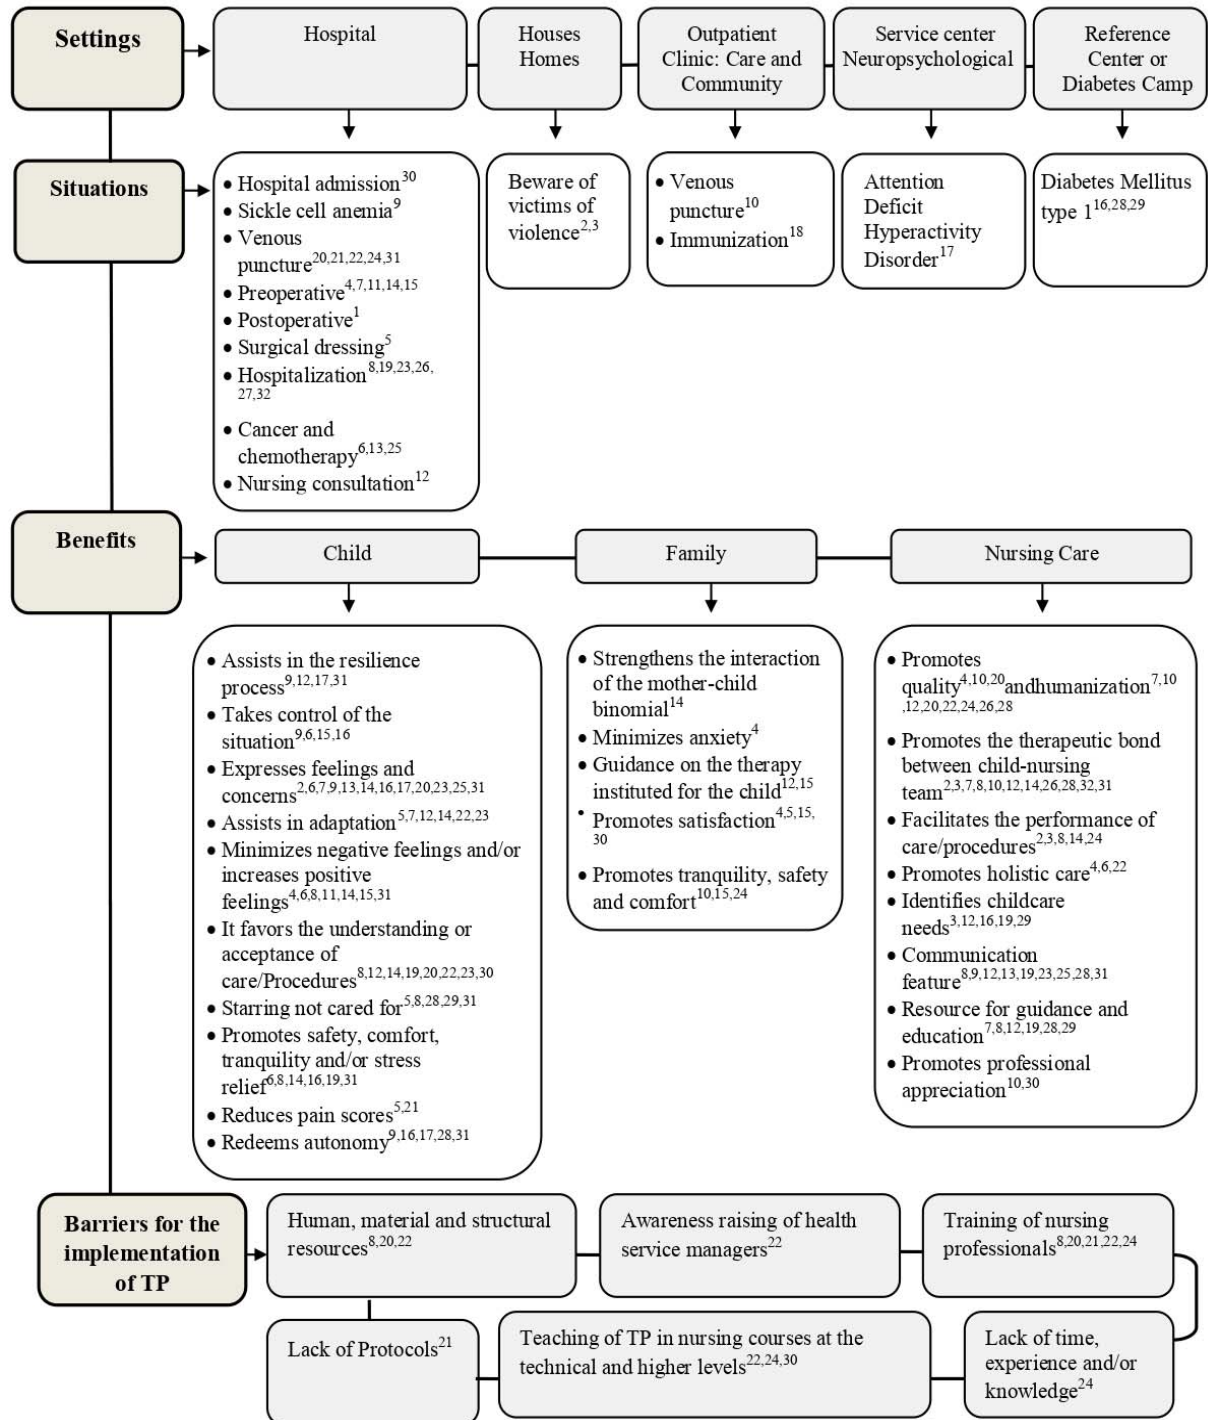

221  
 222  
 223

**Fig. 2.** Diagram of the main findings on the use of therapeutic play in nursing care for school-age children.

224

225 In the settings of the studies, there was a predominance of the hospital environment in 75%  
226 ( $n=24$ ), specifically, in the hospitalization unit ( $n=7$ ), surgical unit ( $n=7$ ), outpatient clinic ( $n=4$ ),  
227 clinical ( $n=4$ ), intensive care unit ( $n=2$ ), occupational education and therapy space ( $n=2$ ) and  
228 pediatric emergency department ( $n=1$ ). We highlight a study that was conducted in three sectors of  
229 one hospital and another study took place in two sectors.

230 The studies used the ITP and DTP modalities in several situations in nursing care for school-  
231 age children. The TP in general was more explored in the hospital environment with care strategy in  
232 the hospitalization process ( $n=6$ ), in the preparation for the venous puncture procedure ( $n=5$ ),  
233 preoperative ( $n=5$ ) and with children with cancer undergoing chemotherapy treatment ( $n=3$ ).

234 The ITP involved situations of venous puncture (Berté et al., 2017; Conceição et al., 2011;  
235 Dantas et al., 2016; Lemos et al., 2016b), immunization (Pontes et al., 2015), preoperative (Fontes  
236 et al., 2010; Fontes et al., 2013; Li et al., 2014; Li & Lopez, 2008; Vaezzadeh et al., 2011), dressing  
237 of small and medium-sized surgeries (Fontes et al., 2010; Kiche & Almeida, 2009). Also, during  
238 procedures during hospital admission (Aranha et al., 2020), pain management in the face of venous  
239 puncture (Lemos et al., 2016a), hospitalization (Caleffi et al., 2016 ; Jansen et al., 2010) and  
240 education in glycemic monitoring and insulin therapy for children with diabetes (Cruz et al., 2012;  
241 La Banca et al., 2019; Pennafort et al., 2018).

242 The DTP was used in nursing care in postoperative recovery (Duarte et al., 1987), diabetes  
243 mellitus (La Banca et al., 2015), sickle cell anemia (Souza, 2011), Attention Deficit Hyperactivity  
244 Disorder (Pereira et al., 2015), accessing a Port-a-Cath and chemotherapy (Campos, 2017; Ribeiro  
245 et al., 2009; Souza et al., 2012), venous puncture (Barroso et al., 2020) and hospitalization (Caleffi  
246 et al., 2016; Fontes et al., 2017; Quintans, 2016; Santos et al., 2020; S. G. T. Silva et al., 2017), as  
247 well as in a nursing consultation with children with type 1 diabetes mellitus (Cruz et al., 2012) and  
248 in the construction of a model of nursing care for children victims of violence (sexual abuse,  
249 physical abuse or neglect) (Rocha & Prado, 2006; Rocha et al., 2008).

250 It was found that TP has many benefits, mainly as an ally of the school-age child in the  
251 expression of feelings and concerns ( $n=12$ ), favoring understanding or acceptance of  
252 care/procedures ( $n=8$ ), increasing positive feelings (satisfaction, joy and motivation) and  
253 minimizing negative feelings (pain, anxiety, anguish and stress) ( $n=7$ ) and promoting safety,  
254 comfort, tranquility and/or stress relief ( $n=6$ ). For the family, there was a predominance of the  
255 feeling of satisfaction ( $n=4$ ), tranquility, safety and comfort ( $n=3$ ) in view of the benefits of TP for  
256 their children.

257 TP can help the nursing professional, being more cited to establish the therapeutic bond with  
258 the child ( $n=11$ ), promote communication ( $n=9$ ), humanization ( $n=8$ ) and education/orientation

259 ( $n=6$ ). Among the barriers for the implementation of this strategy in care, we highlight the need for  
260 training of nursing professionals ( $n=5$ ), teaching of TP in nursing education at the technical/higher  
261 levels ( $n=3$ ) and the need for human, material and structural resources ( $n=3$ ).

262

## 263 **Discussion**

264

265 The objective of this scoping review was to map the use of therapeutic play in nursing care  
266 for school-age children. In this sense, it allowed us to verify that the theme in focus has been  
267 discussed over the years in research in the scientific literature. It was identified that the use of TP in  
268 nursing care for this age group has been predominantly described in the hospital setting (Aranha et  
269 al., 2020; Barroso et al., 2020; Berté et al., 2017; Caleffi et al., 2016; Campos, 2017; Cruz et al.,  
270 2012; Dantas et al., 2016; Duarte et al., 1987; Fontes et al., 2010; Fontes et al., 2013; Fontes et al.,  
271 2017; Jansen et al., 2010; Kiche & Almeida, 2009; Lemos et al., 2016a; Lemos et al., 2016b; Li et  
272 al., 2014; Li & Lopez, 2008; Quintans, 2016; ; Ribeiro et al., 2009; Santos et al., 2020; S. G. T.  
273 Silva et al., 2017; Souza, 2011; Souza et al., 2012; Vaezzadeh et al., 2011).

274 The hospital, in fact, represents a setting in which children can express fear and physical  
275 pain due to isolation, lack of engagement with friends and family. Children verbalize and draw  
276 about it in some studies around the world, which means it is a universal child reaction. During  
277 hospitalization, children face invasive, unknown and painful nursing procedures that can leave them  
278 at a high level of anxiety, leading them to express behavior changes (Campos et al., 2020;  
279 Cassemiro et al., 2020).

280 In this context, children's anxiety can be managed with different clinical actions, such as  
281 therapy with games, communication skills and can be measured by different types of tools. Anxiety  
282 is an important phenomenon in the field of pediatric nursing care, is defined as a nursing diagnosis  
283 and needs to be managed through playful therapy that has positive effects on children's behavior,  
284 pain relief and acceptance of nursing procedures during hospitalization (Campos et al., 2020;  
285 Godino-Iáñez et al., 2020; R. D.M. Silva et al., 2017).

286 It is emphasized that playing is a basic need of every child, even when they are sick,  
287 essential for their motor, mental, emotional and social development, being the most genuine way  
288 that they use to communicate and express themselves (Paladino et al., 2014). Silva and Cabral  
289 (2014) reinforce that the maintenance of play is a need and right of children who demand nursing  
290 care of different natures.

291 The nursing team should be attentive to this need and provide the opportunity of TP for the  
292 school-age child, seeking to incorporate into their practices in the health environment whenever  
293 appropriate or acceptable (Marques et al., 2015), because TP is an care strategy that can be

294 transferable to all children in different places or cultural contexts (Liet al., 2014).When the toy is  
295 provided in a therapeutic way, nursing care becomes a distraction, having a better understanding on  
296 the part of the child, allowing greater adaptation and acceptance of therapy. The environment  
297 becomes a playful and welcoming atmosphere, which allows the child to express their needs and  
298 actively participate in care, softening their doubts, fears and longings (Cruz et al., 2012).

299 The modalities of ITP and DTP were used in the studies. While there is a gap in the use of  
300 ETP, as it was not mentioned in studies identified in this review. The findings show that the  
301 importance of ITP and DTP has been reported for different situations, most of them in the hospital  
302 context.

303 Regarding the implementation of the TP sessions, they were performed individually or in  
304 groups, being mediated by dolls representative of the family, animals, health professionals,  
305 symbolic or real objects of the hospital setting and the domestic setting, with the participation of  
306 children handling toys, as well as storytelling illustrating nursing care, followed by dramatization  
307 by children. The duration of the sessions ranged from 15 to 60 minutes.

308 It was noted the lack of protocols to guide the development of TP sessions with the school-  
309 age group, highlighting the need for construction and validation of protocols for conducting  
310 systematic and effective sessions of the modalities of TP.

311 A study included in this review (Lemos et al., 2016a) points out that the systematic use of  
312 TP in care includes not only the use of regular use, but also the use of validated national and  
313 international protocols. In a study (Li et al., 2014) conducted in China, the authors used a protocol  
314 for conducting TP when preparing Chinese school-age children preoperatively. A study (Lemos et  
315 al., 2016a) conducted in Brazil informs that it has been necessary to adapt existing protocols to use  
316 TP in other procedures and other age groups, such as in the study of the authors themselves who  
317 used for school-age children a protocol elaborated for preschoolers. They also highlight that, in  
318 daily practice, many professionals end up applying the TP sessions in an uncoordinated, irregular  
319 and only empirical way.

320 Given the experience of Martins et al. (2001), the structuring of a protocol for the use of TP  
321 with preschoolers contributed to successfully perform the TP technique, was easy to apply and  
322 proved effective to achieve the proposed benefits, as well as emphasize that in addition to  
323 considering playing as a child's need in nursing care, it is necessary to consider the characteristics of  
324 their development.

325 In this review, the authors of a study (Caleffi et al., 2016) conducted the systematic  
326 application of TP through the Nursing Care Model Caring Playing, which is structured in three  
327 stages “Welcoming, Playing and Finishing” and realized that it can be applied to all existing types  
328 of TP, with the possibility of being useful beyond the hospital environment.



329 The importance of TP is undeniable, and the results of this review are perceived as a  
330 consensus in the literature about its vast benefits for school-age children, family and nursing, with  
331 evidence in studies that highlight its efficacy (Cruz et al., 2012; Lemos et al., 2016a; Li et al., 2014;  
332 Li & Lopez, 2008; Vaezzadeh et al., 2011) and show that the family accepts and supports the  
333 practice of TP (Aranha et al., 2020; Berté et al., 2017; Conceição et al., 2011; Li et al., 2014; Li &  
334 Lopez, 2008).

335 The studies included in this review reinforce the relevance of integrating the TP in nursing  
336 care routine for school-age children and their families, due to the benefits resulting from its use and  
337 positive results with the TP for school-age children. Only one study that aimed to evaluate the effect  
338 of DTP on the degree of anxiety in hospitalized school-age children submitted to intravenous  
339 puncture did not identify a significant reduction in anxiety, but the authors recommend the  
340 application of DTP based on other studies that have demonstrated the positive effect in reducing the  
341 anxiety of school-age children (S. G. T. Silva et al., 2017).

342 However, there are still barriers to implement TP in nursing care, such as the need for  
343 teaching of TP in nursing training at the technical/higher levels, training of nursing professionals,  
344 human resources, materials and structural, lack of protocols, lack of time, experience and/or  
345 knowledge of professionals, and sensitization of health service managers (Aranha et al., 2020; Berté  
346 et al., 2017; Dantas et al., 2016; Jansen et al., 2010; Lemos et al., 2016a; Lemos et al., 2016b).  
347 These barriers need to be overcome and cannot be a hindrance to providing the school-age child  
348 with this valuable care strategy that instigates less traumatic care with vast benefits.

349 To break the barriers of TP implementation, teaching in all nursing training courses at the  
350 technical and higher levels is necessary, as it prepares and makes students aware of the application  
351 of this strategy in clinical practice (Gesteira et al., 2011). Also, the sensitization of managers of  
352 health services and the nursing team about the importance of TP in child health care and care are  
353 urgent factors to be considered to effect their daily application by pediatric nursing (Claus et al.,  
354 2021). The strategies of continuing education of the nursing team for the use of the ITP, DTP and  
355 ETP are relevant, and it is necessary to ensure that these professionals have subsidies of human,  
356 structural and material resources for the implementation of this strategy in the routine care of  
357 children's health and to effect child-centered care.

358 Nurses have been discussing child-centered care (CCC), with increased research on this  
359 topic in recent years (Carter & Ford, 2013). In the literature, CCC has been described as an  
360 approach in the same terms as person-centered care and family-centered care. In the field of CCC,  
361 children are seen as social agents, the nurse's communication skills are important to recognize the  
362 needs, thoughts and actions of children. The CCC proposes to be a means by which nurses can



363 provide a beneficial and therapeutic relationship with the child (Coyne et al., 2018; Ford et al.,  
364 2018).

365 Art-based approaches have been used by nurses to provide care and research with children.  
366 Some art-based care options are poetry, music, visual arts, performance, drawing and crafts (Carter  
367 & Ford, 2013). Therapeutic play has been reported in different studies and therapeutic play is one of  
368 the types that have shown positive effects during childhood hospitalization (Godino-Iáñez et al.,  
369 2020; R. D.M. Silva et al., 2017).

370 A school-age child acquires language and symbolic function, but presents egocentric,  
371 playful and magical thinking. For their, the TP represents the opportunity to touch, manipulate,  
372 interact in a concrete and symbolic way with dolls and medical devices (such as syringe, gauze and  
373 stethoscope, for example) and express their feelings and internal perceptions through play (R. D.M.  
374 Silva et al., 2017).

375 Studies of this review have identified the lack of TP in the routine of nursing care for  
376 school-age children (Berté et al., 2017; Dantas et al., 2016; Jansen et al., 2010; Souza et al., 2012).  
377 We cannot conclude that this practice in general is routinely scarce, but it was little mentioned in  
378 the literature analyzed in this review.

379 Pediatric nurses should be able to implement care respecting the high standards of care for  
380 children and families (Mott et al., 2018). Nursing students demonstrated to receive only theoretical  
381 preparation to implement TP sessions, but not practical clinical training during graduation, which  
382 left them insecure to conduct the sessions (Barreto et al., 2017; Barroso et al., 2019).

383 All members of the nursing team play an important role in the promotion and execution of  
384 playful activities that help them provide quality and humanized care to the child (Barroso et al.,  
385 2020).

386 Evidence from this review emphasizes that TP is a fast, easy-to-apply and low-cost strategy  
387 (Aranha et al., 2020; Li et al., 2014; Li & Lopez, 2008; S. G. T. Silva et al., 2017;) and many  
388 (Aranha et al., 2020; Barroso et al., 2020; Campos, 2017; Conceição et al., 2011; Dantas et al.,  
389 2016; Jansen et al., 2010; La Banca et al., 2015; Li et al., 2014; Li & Lopez, 2008; Ribeiro et al.,  
390 2009; Santos et al., 2020; Souza et al., 2012) promote the awareness of nursing professionals that  
391 playing is a fundamental aspect in children's life and show the importance of TP as an essential  
392 strategy for holistic and quality nursing care for children's health. Therefore, based on the positive  
393 results achieved with TP, they encourage integrating it into the planning of pediatric nursing care  
394 and be implemented as routine and systematic care strategy whenever appropriate or acceptable for  
395 children, as well as applied compatible with the age group.

396

397 **Limitations of this study**

398

399 A possible limitation of this scoping review is related to the number of databases used for  
400 bibliographic search, given the possibility of identifying indexed publications in other databases.

401

## 402 **Conclusions**

403

404 This scoping review identified that the TP is a care strategy with vast benefits for children,  
405 families and nursing, but there are still barriers for its implementation in the nursing care routine.  
406 There was also that the use of ITP and DTP in nursing care for school-age children has been  
407 investigated predominantly in situations related to the hospital setting.

408 There are gaps regarding the exploration of TP in pediatric nursing practice in out-of-  
409 hospital health services. In addition, lack data on the use of ETP and is need for the structuring of  
410 protocols to support the conduct of TP sessions with the school-age children.

411

## 412 **Implications for practice**

413

414 The positive results reported in the studies reinforces the TP as an important care strategy in  
415 nursing practice, can be used to enrich the discussions about the use of TP in nursing care for  
416 school-age children and encourage awareness about the importance of this resource in care to  
417 children.

418 The gaps identified indicate the need for future research that explores the potential of TP as  
419 a nursing care strategy for school-age child in out-of-hospital health services, which generate  
420 knowledge about the modality of ETP with the school-age child and the construction of protocols.  
421 Favoring expanding scientific knowledge in the area and strengthening the use of TP based on  
422 evidence-based practice.

423

## 424 **Declaration of competing interest**

425

426 None.

427

## 428 **References**

429 Aranha, B. F., Souza, M. A., Pedroso, G. E. R., Maia, E. B. S., & Melo, L. L. (2020). Using the  
430 instructional therapeutic play during admission of children to hospital: the perception of the  
431 family. *Revista Gaúcha de Enfermagem*, 41, e20180413. <https://doi.org/10.1590/1983-1447.2020.20180413>

432

- 433 Barreto, L. M. S. C., Maia, E. B. S., Depianti, J. R. B., Melo, L. L., Ohara, C. V. S., & Ribeiro, C.  
434 A. (2017). Giving meaning to the teaching of Therapeutic Play: the experience of nursing  
435 students. *Escola Anna Nery*, 21(2), e20170038. <https://doi.org/10.5935/1414-8145.20170038>
- 436 Barroso, M. C. C. S., Machado, M. E. D., Cursino, E. G., Silva, L. R., Depianti, J. R. B., & Silva, L.  
437 F. (2019). The therapeutic play in nursing graduation: from theory to practice. *Journal of*  
438 *Research Fundamental Care Online*, 11(4), 1043-1047. [http://doi.org/10.9789/2175-](http://doi.org/10.9789/2175-5361.2019.v11i4.1043-1047)  
439 [5361.2019.v11i4.1043-1047](http://doi.org/10.9789/2175-5361.2019.v11i4.1043-1047)
- 440 Barroso, M. C., Santos, R. S., Santos, A. E., Nunes, M. D., & Lucas, E. A. (2020). Children's  
441 perception of venipuncture through therapeutic toy. *Acta Paulista de Enfermagem*, 33, 1-8.  
442 <https://doi.org/10.37689/acta-ape/2020AO0296>
- 443 Berté, C., Ogradowski, K. R. P., Zagonel, I. P. S., Tonin, L., Favero, L., & Almeida Junior, R. L.  
444 (2017). Therapeutic toy in the context of pediatric emergency. *Revista Baiana de Enfermagem*,  
445 31(3), e20378. <http://doi.org/10.18471/rbe.v31i3.20378>
- 446 Brondani, J. P., & Pedro, E. N. R. (2019). The use of children's stories in nursing care for the child:  
447 an integrative review. *Revista Brasileira de Enfermagem*, 72(Suppl 3), 333-342.  
448 <https://doi.org/10.1590/0034-7167-2018-0456>
- 449 Burns-Nader, S., & Hernandez-Reif, M. (2014). Facilitating Play for Hospitalized Children  
450 Through Child Life Services. *Children's Health Care*. 45(1), 1-21.  
451 <http://doi.org/10.1080/02739615.2014.948161>
- 452 Caleffi, C. C. F., Rocha, P. K., Anders, J. C., Souza, A. I. J., Burciaga, V. B., & Serapião, L. S.  
453 (2016). Contribution of structured therapeutic play in a nursing care model for hospitalised  
454 children. *Revista Gaúcha de Enfermagem*, 37(2), e58131. [http://doi.org/10.1590/1983-](http://doi.org/10.1590/1983-1447.2016.02.58131)  
455 [1447.2016.02.58131](http://doi.org/10.1590/1983-1447.2016.02.58131)
- 456 Campos, S. M. S. (2017). *O brincar de faz de conta de crianças com câncer que se submetem ao*  
457 *processo de quimioterapia* [Master's thesis, Universidade de São Paulo]. Catálogo de teses e  
458 dissertações CAPES.  
459 [https://sucupira.capes.gov.br/sucupira/public/consultas/coleta/trabalhoConclusao/viewTrabalho](https://sucupira.capes.gov.br/sucupira/public/consultas/coleta/trabalhoConclusao/viewTrabalhoConclusao.jsf?popup=true&id_trabalho=5197863)  
460 [Conclusao.jsf?popup=true&id\\_trabalho=5197863](https://sucupira.capes.gov.br/sucupira/public/consultas/coleta/trabalhoConclusao/viewTrabalhoConclusao.jsf?popup=true&id_trabalho=5197863)
- 461 Campos, F. V., Antunes, C. F., Damião, E. B., Rossato, L. M., & Nascimento, L. C. (2020).  
462 Anxiety assessment tools in hospitalized children. *Acta Paulista de Enfermagem*, 33,  
463 eAPE20180250. <http://doi.org/10.37689/actaape/2020AR02505>
- 464 Carter, B., & Ford, K. (2013). Researching Children's Health Experiences: The Place for  
465 Participatory, Child-Centered, Arts-Based Approaches. *Research in Nursing & Health*, 36(1),  
466 95-107. <http://doi.org/10.1002/nur.21517>
- 467 Cassemiro, L. K. D. S., Okido, A. C. C., Furtado, M. C. C., & Lima, R. A. G. (2020). The hospital  
468 designed by hospitalized children and adolescents. *Revista Brasileira de Enfermagem*,  
469 73(Suppl 4), e20190399. <http://doi.org/10.1590/0034-7167-2019-0399>
- 470 Claus, M. I. S., Maia, E. B. S., Oliveira, A. I. B., Ramos, A. L., Dias, P. L. M., & Wernet, M.  
471 (2021). The insertion of play and toys in Pediatric Nursing practices: A convergent care  
472 research". *Escola Anna Nery*, 25(3), e20200383. <https://doi.org/10.1590/2177-9465-2020-0383>
- 473 Conceição, C. M., Ribeiro, C. A., Borba, R. I. H., Ohara, C. V. S., & Andrade, P. R. (2011).  
474 Brinquedo terapêutico no prepare da criança para punção venosa ambulatorial: percepção dos  
475 pais e acompanhantes. *Escola Anna Nery*, 15(2), 346-353. [https://doi.org/10.1590/S1414-](https://doi.org/10.1590/S1414-81452011000200018)  
476 [81452011000200018](https://doi.org/10.1590/S1414-81452011000200018)
- 477 Costa, W. M., Sousa, H. O., & Fernandes, M. R. (2019). Brinquedo terapêutico na enfermagem  
478 pediátrica brasileira: uma revisão da literatura das evidências atuais. *Journal of the Health*  
479 *Sciences Institute*, 37(3), 260-263.
- 480 Costa, D. T. L., Veríssimo, M. L. O. R., Toriyama, A. T. M., & Sigaud, C. H. S. (2016). O brincar  
481 na assistência de enfermagem à criança – revisão integrativa. *Revista da Sociedade Brasileira de*  
482 *Enfermeiros Pediatras*, 16(1), 36-43.

- 483 Coyne, I., Holmström, I., & Söderbäck, M. (2018). Centeredness in Healthcare: A Concept  
484 Synthesis of Family-centered Care, Person-centered Care and Child-centered Care. *Journal of*  
485 *Pediatric Nursing*, 42, 45-56. <https://doi.org/10.1016/j.pedn.2018.07.001>
- 486 Cruz, D. S. M., Collet, N., & Marques, D. K. A. (2012). Importance of using therapeutic toys in  
487 care of children with diabetes type 1. *Journal of Nursing UFPE*, 6(4), 849-853.  
488 <https://doi.org/10.5205/1981-8963-v6i4a7108p849-853-2012>
- 489 Dantas, F. A., Nóbrega, V. M., Pimenta, E. A. G., & Collet, N. (2016). Use of therapeutic play  
490 during intravenous drug administration in children: exploratory study. *Online Brazilian Journal*  
491 *of Nursing*, 15(3), 1-10. <https://doi.org/10.17665/1676-4285.20165581>
- 492 Duarte, E. R. M., Müller, A. M., Bruno, S. M. A., & Duarte, A. L. S. (1987). A utilização do  
493 brinquedo na sala de recuperação: um recurso a mais para assistência de enfermagem à criança.  
494 *Revista Brasileira de Enfermagem*, 40(1), 74-81. <https://doi.org/10.1590/S0034-71671987000100013>
- 495  
496 Fontes, C. M. B., Mondini, C. C. S. D., Moraes, M. C. A. F., Bachega, M. I., & Maximino, N. P.  
497 (2010). Utilização do brinquedo terapêutico na assistência à criança hospitalizada. *Revista*  
498 *Brasileira de Educação Especial*, 16(1), 95-106. <https://doi.org/10.1590/S1413-65382010000100008>
- 499  
500 Fontes, C. M. B., Oliveira, A. S. S., & Toso, L. A. (2017). Brinquedo terapêutico em unidade de  
501 terapia intensiva pediátrica. *Revista de Enfermagem UFPE*, 11(Supl.7), 2907-2915.  
502 <https://doi.org/10.5205/reuol.11007-98133-3-SM.1107sup201712>
- 503 Fontes, C. M. B., Sá, F. M., Mondini, C. C. S. D., & Moraes, M. C. A. F. (2013). Therapeutic toy  
504 and child preparation for correction of cleft lip and palate surgery. *Journal of Nursing UFPE*,  
505 7(7), 4681-4688. <https://doi.org/10.5205/reuol.4656-38001-2-SM.0707201313>
- 506 Ford, K., Campbell, S., Carter, B., & Earwaker, L. (2018). The concept of child-centered care in  
507 healthcare: a scoping review protocol. *JBI Database of Systematic Reviews and Implementation*  
508 *Reports*, 16(4), 845–851. <https://doi.org/10.11124/JBISRIR-2017-003464>
- 509 Francischinelli, A. G. B., Almeida, F. A., & Fernandes, D. M. S. O. (2012). Routine use of  
510 therapeutic play in the care of hospitalized children: nurses' perceptions. *Acta Paulista de*  
511 *Enfermagem*, 25(1), 18-23. <https://doi.org/10.1590/S0103-21002012000100004>
- 512 Gesteira, E. R., Gonçalves, D. S., Marques, F., & Simões, F. D. (2011). A experiência de alunos na  
513 utilização do brinquedo terapêutico no estágio de enfermagem pediátrica. *Revista de*  
514 *Enfermagem da UFPE*, 5(7), 1807-1811. <https://doi.org/10.5205/reuol.1262-12560-1-LE.0507201132>
- 515  
516 Godino-Iáñez, M. J., Martos-Cabrera, M. B., & Suleiman-Martos, N., Urquiza, J. L. G., Vargas-  
517 Román, K., Membrive, M. J., & Albendin, L. (2020). Play Therapy as an Intervention in  
518 Hospitalized Children: A Systematic Review. *Healthcare*, 8(3), 239.  
519 <https://doi.org/10.3390/healthcare8030239>
- 520 Hockenberry, M. J., & Wilson, D. (2011). *Wong: fundamentos de enfermagem pediátrica*. Elsevier..
- 521 Jansen, M. F., Santos, R. M., & Favero, L. (2010). Benefícios da utilização do brinquedo durante o  
522 cuidado de enfermagem prestado a criança hospitalizada. *Revista Gaucha de Enfermagem*,  
523 31(2), 247-253. <https://doi.org/10.1590/S1983-14472010000200007>
- 524 Kiche, M. T., & Almeida, F. A. (2009). Therapeutic toy: strategy for pain management and tension  
525 relief during dressing change in children. *Acta Paulista de Enfermagem*, 22(2), 125-130.  
526 <https://doi.org/10.1590/S0103-21002009000200002>
- 527 La Banca, R. O., Monteiro, O. O., Ribeiro, C. A., & Borba, R. I. H. (2015). School experience of  
528 children with diabetes mellitus expressed by dramatic therapeutic play. *Journal of Nursing*  
529 *UFPE*, 9(Supl. 7), 9009-9017. <https://doi.org/10.5205/reuol.8074-70954-1-SM0907supl201510>
- 530 Lemos, I. C. S., Oliveira, J. D., Gomes, E. B., Silva, K. V. L., Silva, P. K. S., & Fernandes, G. P.  
531 (2016b). Brinquedo terapêutico no procedimento de omissão venosa: estratégia para reduzir  
532 alterações comportamentais. *Revista Cuidarte*, 7(1), 1163-1170.  
533 <https://doi.org/10.15649/cuidarte.v7i1.303>



- 534 Lemos, I. C. S., Silva, L. G., Delmondes, G. A., Brasil, A. X., Santos, P. L. F., Gomes, E. B., Silva,  
535 K. V. L. G., Oliveira, D. R., Oliveira, J. D., Fernandes, G. P., & Kerntopf, M. R. (2016a).  
536 Therapeutic Play Use in Children under the Venipuncture: A Strategy for Pain Reduction.  
537 *American Journal of Nursing Research*, 4(1), 1-5. <https://doi.org/10.12691/ajnr-4-1-1>
- 538 Li, H. C., & Lopez, V. (2008). Effectiveness and appropriateness of therapeutic play intervention in  
539 preparing children for surgery: a randomized controlled trial study. *Journal for Specialists in*  
540 *Pediatric Nursing*, 13(2), 63-73. <https://doi.org/10.1111/j.1744-6155.2008.00138.x>
- 541 Li, W. H. C., Chan, S. S. C., Wong, E. M. L., Kwok, M. C., & Lee, I. T. L. (2014). Effect of  
542 therapeutic play on pre- and post-operative anxiety and emotional responses in Hong Kong  
543 Chinese children: a randomised controlled trial. *Hong Kong Medical Journal*, 20(Suppl 7), 36-  
544 39.
- 545 Maia, E. B. S., Melo, L. L., La Banca, R. O. (2020). A criança, o adolescente e a hospitalização. In:  
546 N. Collet, B. R. G. O. Toso, & C. S. Vieira (Eds.), *Manual de Enfermagem em pediatria* (pp.  
547 49-53). AB editora.
- 548 Marques, D. K. A., Silva, K. L. B., Cruz, D. S. M., & Souza, I. V. B. (2015). Benefícios da  
549 aplicação do brinquedo terapêutico: visão dos enfermeiros de um hospital infantil. *Arquivos de*  
550 *Ciências da Saúde*, 22(3), 64-68. <https://doi.org/10.17696/2318-3691.22.3.2015.240>
- 551 Martins, M. R., Ribeiro, C. A., Borba, R. I. H., & Silva, C. V. (2001). Protocolo de preparo da  
552 criança pré-escolar para punção venosa, com utilização do brinquedo terapêutico. *Revista*  
553 *Latino-Americana de Enfermagem*, 9(2), 76-85. <https://doi.org/10.1590/S0104-11692001000200011>
- 554  
555 Melo, L. L., Ribeiro, C. A. (2020). (Cre)scendo na ausência da mãe: vivências de crianças durante o  
556 cárcere materno. *Revista Brasileira de Enfermagem*, 73(Suppl 4), e20200413.  
557 <https://doi.org/10.1590/0034-7167-2020-0413>
- 558 Moher, D., Liberati, A., Tetzlaff, J., & Altman, D. G. (2009). Preferred reporting items for  
559 systematic reviews and meta-analyses: the PRISMA statement. *PloS Medicine*, 6(7), e1000097.  
560 <https://doi.org/10.1371/journal.pmed.1000097>
- 561 Mott, S., Fogg, N., Foote, N., Hillier, M., Lewis, D. A., Mcdowell, B. M., Saunders, K., Taylor, J.  
562 T., Wiggins, S., Ivey, J. B., Benedetto, C. O., Beam, P. H., Mcknight, K. B., Taha, A. A., &  
563 Vann-Patterson, A. (2018). Society of Pediatric Nurses' Core Competencies for the Pediatric  
564 Nurse. *Journal of Pediatric Nursing*, 38, 142-144. <https://doi.org/10.1016/j.pedn.2017.11.006>
- 565 Nóbrega, R. D., Collet, N., Gomes, I. P., Holanda, E. R., & Araújo, Y. B. (2010). Criança em idade  
566 escolar hospitalizada: significado da condição crônica. *Texto & Contexto Enfermagem*, 19(3),  
567 425-433. <https://doi.org/10.1590/S0104-07072010000300003>
- 568 Oliveira, C. S., Maia, E. B. S., Borba, R. I. H., & Ribeiro, C. A. (2015). Brinquedo Terapêutico na  
569 assistência à criança: percepção de enfermeiros das unidades pediátricas de um hospital  
570 universitário. *Revista da Sociedade Brasileira de Enfermeiros Pediatras*, 15(1), 21-30.
- 571 Paladino, C. M., Carvalho, R., & Almeida, F. A. (2014). Therapeutic play in preparing for surgery:  
572 behavior of preschool children during the perioperative period. *Revista da Escola de*  
573 *Enfermagem da USP*, 48(3), 423-429. <https://doi.org/10.1590/S0080-623420140000300006>
- 574 Pennafort, V. P. S., Queiroz, M. V. O., Gomes, I. L. V., & Rocha, M. F. F. (2018). Instructional  
575 therapeutic toy in the culture care of the child with diabetes type 1. *Revista Brasileira de*  
576 *Enfermagem*, 71(Suppl 3), 1334-1342. <https://doi.org/10.1590/0034-7167-2017-0260>
- 577 Pereira, A. K., Maia, E. B. S., Borba, R. I. H., & Ribeiro, C. A. (2015). O brincar da criança com  
578 transtorno de déficit de atenção e hiperatividade. *Ciência, Cuidado e Saúde*, 14(2), 1175-1183.
- 579 Peters, M. D. J., Godfrey, C., McInerney, P., Munn, Z., Tricco, A. C., & Khalil, H. (2020). Scoping  
580 Reviews (2020 version). In: E. Aromataris & Z. Munn (Eds), *Joanna Briggs Institute*  
581 *Reviewer's Manual*. The Joanna Briggs Institute. <https://reviewersmanual.joannabriggs.org/>.
- 582 Pontes, J. E. D., Tabet, E., Folkmann, M. A. S., Cunha, M. L. R., & Almeida, F. A.  
583 (2015). Therapeutic play: preparing the child for the vaccine. *Einstein*, 13(2), 238-242.  
584 <https://doi.org/10.1590/S1679-45082015AO2967>

- 585 Quintans, D. E. B. (2016). *O jogo 'faz de conta' na sessão de brinquedo terapêutico de crianças*  
586 *hospitalizadas* [Master's thesis, Universidade Guarulhos]. Catálogo de teses e dissertações  
587 CAPES.  
588 [https://sucupira.capes.gov.br/sucupira/public/consultas/coleta/trabalhoConclusao/viewTrabalho](https://sucupira.capes.gov.br/sucupira/public/consultas/coleta/trabalhoConclusao/viewTrabalhoConclusao.jsf?popup=true&id_trabalho=4055876)  
589 [Conclusao.jsf?popup=true&id\\_trabalho=4055876](https://sucupira.capes.gov.br/sucupira/public/consultas/coleta/trabalhoConclusao/viewTrabalhoConclusao.jsf?popup=true&id_trabalho=4055876)
- 590 Ribeiro, C. A., Coutinho, R. M., Araújo, T. F., & Souza, V. S. (2009). A world of procedures and  
591 worries: Experience of children with a Port-a-Cath. *Acta Paulista de Enfermagem*, 22(spe),  
592 935-941. <https://doi.org/10.1590/S0103-21002009000700017>
- 593 Rocha, P. K., & Prado, M. L. (2006). Violência infantil e brinquedo terapêutico. *Revista Gaúcha de*  
594 *Enfermagem*, 27(3), 463-471.
- 595 Rocha, P. K., Prado, M. L., & Carraro, T. E. (2008). Nursing care model for children victims of  
596 violence. *Australian Journal of Advanced Nursing*, 25(3), 80-85.
- 597 Santos, V. L. A., Almeida, F. A., Ceribelli, C., & Ribeiro, C. A. (2020). Understanding the dramatic  
598 therapeutic play session: a contribution to pediatric nursing. *Revista Brasileira de Enfermagem*,  
599 73(4), e20180812. <https://doi.org/10.1590/0034-7167-2018-0812>
- 600 Santos, F. S., Pereira, Y. J. A. S., Sá, M. C. N., Costa, A. C. P. J., Fontoura, I. G., Serra, M. A. A.  
601 O., Santos Neto, M., Ferreira, A. G. N., Noleto, A. A. S., & Santos, F. D. R. P. (2017). Nursing  
602 intervention with hospitalized children mediated by therapeutic toys. *International Journal of*  
603 *Development Research*, 7(10), 15821-15826.
- 604 Silva, R. D. M., Austregésilo, S. C., Ithamar, L., & Lima, L. S. (2017). Therapeutic play to prepare  
605 children for invasive procedures: a systematic review. *Jornal de Pediatria*, 93(1), 6-16.  
606 <https://doi.org/10.1016/j.jpmed.2016.06.005>
- 607 Silva, L. F., & Cabral, I. E. (2014). Cancer repercussions on play in children: implications for  
608 nursing care. *Texto Contexto Enfermagem*, 23(4), 935-943. [https://doi.org/10.1590/0104-](https://doi.org/10.1590/0104-07072014002380013)  
609 [07072014002380013](https://doi.org/10.1590/0104-07072014002380013)
- 610 Silva, S. G. T., Santos, M. A., Floriano, C. M. F., Damião, E. B. C., Campos, F. V., & Rossato, L.  
611 M. (2017). Influence of Therapeutic Play on the anxiety of hospitalized school-age children:  
612 Clinical trial. *Revista Brasileira de Enfermagem*, 70(6), 1244-1249.  
613 <https://doi.org/10.1590/0034-7167-2016-0353>
- 614 Souza, A. A. M. (2011). *Uma vida dominada pela dor: a criança vivenciando a anemia falciforme*.  
615 [Master's thesis, Universidade Federal de São Paulo]. Repositório Institucional da  
616 Universidade Federal de São Paulo.  
617 [https://repositorio.unifesp.br/xmlui/handle/11600/10153?locale-attribute=pt\\_BR](https://repositorio.unifesp.br/xmlui/handle/11600/10153?locale-attribute=pt_BR)
- 618 Souza, L. P. S., Silva, R. K. P., Amaral, R. G., Souza, A. A. M., Mota, E. C., & Silva, C. S. O.  
619 (2012). Câncer infantil: sentimentos manifestados por crianças em quimioterapia durante  
620 sessões de brinquedo terapêutico. *Revista Rene*, 13(3), 686-692.
- 621 The United Nations Children's Fund. (1990). Convention on the Rights of the Child text. [cited  
622 2020 Apr 23]. Available from: <https://www.unicef.org/child-rights-convention/convention-text>
- 623 Tricco, A. C., Lillie, E., Zarin, W., O'Brien, K. K., Colquhoun, H., Levac, D.,...Straus, S. E..  
624 (2018). PRISMA Extension for Scoping Reviews (PRISMA ScR): Checklist and Explanation.  
625 *Annals of Internal Medicine*, 169(7), 467-73. <https://doi.org/10.7326/M18-0850>
- 626 Vaezzadeh, N., Douki, Z. E., Hadipour, A., Osia, S., Shahmohammadi, S., Sadeghi, R. (2011).  
627 The effect of performing preoperative preparation program on school age children's anxiety.  
628 *Iran Journal Pediatr*[Internet]. [cited 2020 Jul 5];21(4):461-66.
- 629 World Health Organization Regional Office for Europe (2017). Children's rights in Hospital:  
630 Rapid-assessment checklists. <http://www.euro.who.int/pubrequest>.
- 631 World Health Organization (2018). Standards for improving the quality of care for children and  
632 young adolescents in health facilities.  
633 [https://www.who.int/maternal\\_child\\_adolescent/documents/quality-standards-child-](https://www.who.int/maternal_child_adolescent/documents/quality-standards-child-adolescent/en/)  
634 [adolescent/en/](https://www.who.int/maternal_child_adolescent/documents/quality-standards-child-adolescent/en/).
- 635  
636
